# Supplementary material for: The ribosome lowers the entropic penalty of protein folding
Source: PubMed Central journal article supplement (PMC11374706; doi:10.1038/s41586-024-07784-4), 2024-08-07
Supplement: 41586_2024_7784_MOESM2_ESM.pdf [file 41586_2024_7784_MOESM2_ESM.pdf]

## Reporting Summary

Nature Portfolio wishes to improve the reproducibility of the work that we publish. This form provides structure for consistency and transparency in reporting. For further information on Nature Portfolio policies, see our [Editorial Policies](#) and the [Editorial Policy Checklist](#).

### Statistics

For all statistical analyses, confirm that the following items are present in the figure legend, table legend, main text, or Methods section.

n/a Confirmed

- The exact sample size ( $n$ ) for each experimental group/condition, given as a discrete number and unit of measurement
- A statement on whether measurements were taken from distinct samples or whether the same sample was measured repeatedly
- The statistical test(s) used AND whether they are one- or two-sided  
*Only common tests should be described solely by name; describe more complex techniques in the Methods section.*
- A description of all covariates tested
- A description of any assumptions or corrections, such as tests of normality and adjustment for multiple comparisons
- A full description of the statistical parameters including central tendency (e.g. means) or other basic estimates (e.g. regression coefficient) AND variation (e.g. standard deviation) or associated estimates of uncertainty (e.g. confidence intervals)
- For null hypothesis testing, the test statistic (e.g.  $F$ ,  $t$ ,  $r$ ) with confidence intervals, effect sizes, degrees of freedom and  $P$  value noted  
*Give  $P$  values as exact values whenever suitable.*
- For Bayesian analysis, information on the choice of priors and Markov chain Monte Carlo settings
- For hierarchical and complex designs, identification of the appropriate level for tests and full reporting of outcomes
- Estimates of effect sizes (e.g. Cohen's  $d$ , Pearson's  $r$ ), indicating how they were calculated

*Our web collection on [statistics for biologists](#) contains articles on many of the points above.*

### Software and code

Policy information about [availability of computer code](#)

|                 |                                                                                                                                                                                                                                                                                                                                                                                                                                                                                                                                                                                                                                                                                                                                                                                                                                                                                                                                  |
|-----------------|----------------------------------------------------------------------------------------------------------------------------------------------------------------------------------------------------------------------------------------------------------------------------------------------------------------------------------------------------------------------------------------------------------------------------------------------------------------------------------------------------------------------------------------------------------------------------------------------------------------------------------------------------------------------------------------------------------------------------------------------------------------------------------------------------------------------------------------------------------------------------------------------------------------------------------|
| Data collection | NMR data were recorded using Topspin 3.5pl2, pulse sequences available on <a href="https://github.com/chriswaudby/pp">https://github.com/chriswaudby/pp</a> . Further details are provided in the Methods. MD simulations were performed and processed with GROMACS version 2021.3. To generate the C-alpha (CA) topologies for MD (with GROMACS version 2018.3), SMOG version 2.3 was used and PULCHRA (version 3.06) for all-atom backmapping. For model building and visualisation, PyMol version 2.3 was used.                                                                                                                                                                                                                                                                                                                                                                                                               |
| Data analysis   | NMR data were analysed using CCPN (version 2.4), nmrPipe (version 11.7) and MATLAB (R2017b, The MathWorks Inc.), codes are available on <a href="https://github.com/shschan/NMR-fit">github.com/shschan/NMR-fit</a> . Python analyses utilised version 3.7. Python scripts used to calculate PRE-NMR data from the ensembles and to refine the ensembles by reweighting are available on Github ( <a href="https://github.com/julian-streit/PREweighting">https://github.com/julian-streit/PREweighting</a> ). SAXS data were processed and analysed with PRIMUS/ATSAS version 3.2.1. Chemical shifts were calculated with SHIFTX2 (version 1.10A). RDCs were calculated with PALES (Linux version 10.0). Pepsi-SAXS (version 3.0) was used to calculate SAXS scattering profiles. Blot image densitometry analyses were performed with ImageJ version 1.51. Water entropy calculations were performed with DoSPT version 0.2.2. |

For manuscripts utilizing custom algorithms or software that are central to the research but not yet described in published literature, software must be made available to editors and reviewers. We strongly encourage code deposition in a community repository (e.g. GitHub). See the Nature Portfolio [guidelines for submitting code & software](#) for further information.

## Data

Policy information about [availability of data](#)

All manuscripts must include a [data availability statement](#). This statement should provide the following information, where applicable:

- Accession codes, unique identifiers, or web links for publicly available datasets
- A description of any restrictions on data availability
- For clinical datasets or third party data, please ensure that the statement adheres to our [policy](#)

Data supporting the findings of this study are included in the article, source data, and extended data. The NMR assignment of FLN5 A3A3 has been previously deposited in the BMRB under the entry code 51023. The structural ensembles of the unfolded states are available on Zenodo (DOI: 10.5281/zenodo.11618750).

## Research involving human participants, their data, or biological material

Policy information about studies with [human participants or human data](#). See also policy information about [sex, gender \(identity/presentation\), and sexual orientation](#) and [race, ethnicity and racism](#).

|                                                                    |     |
|--------------------------------------------------------------------|-----|
| Reporting on sex and gender                                        | N/A |
| Reporting on race, ethnicity, or other socially relevant groupings | N/A |
| Population characteristics                                         | N/A |
| Recruitment                                                        | N/A |
| Ethics oversight                                                   | N/A |

Note that full information on the approval of the study protocol must also be provided in the manuscript.

## Field-specific reporting

Please select the one below that is the best fit for your research. If you are not sure, read the appropriate sections before making your selection.

Life sciences  Behavioural & social sciences  Ecological, evolutionary & environmental sciences

For a reference copy of the document with all sections, see [nature.com/documents/nr-reporting-summary-flat.pdf](https://nature.com/documents/nr-reporting-summary-flat.pdf)

## Life sciences study design

All studies must disclose on these points even when the disclosure is negative.

|                 |                                                                                                                                                                                                                                                                                                                                                                                                                                                                                                                                                                                                                                                                                                                                                                                                                                                                          |
|-----------------|--------------------------------------------------------------------------------------------------------------------------------------------------------------------------------------------------------------------------------------------------------------------------------------------------------------------------------------------------------------------------------------------------------------------------------------------------------------------------------------------------------------------------------------------------------------------------------------------------------------------------------------------------------------------------------------------------------------------------------------------------------------------------------------------------------------------------------------------------------------------------|
| Sample size     | No samples sizes were predetermined. Samples sizes were chosen according to standards generally accepted in the protein folding/structural & computational biology fields. NMR experiments were summed from multiple experiments (generally >20) until signal/noise was sufficiently high, which is typical for NMR studies. All samples undergo rigorous biochemical and NMR quality control measurements, as described. For PRE-NMR experiments, we performed duplicates (n=2) for isolated FLN5 A3A3 labelled at C740 and the FLN5+31 A3A3 RNC labelled at C699, C740 and C744. Repeats were biological repeats (independent sample purifications) and reproduced the data within uncertainty of the measurements. HRAS refolding experiments were performed in triplicate (n=3). These samples sizes were deemed sufficient as repeats led to identical conclusions. |
| Data exclusions | No data were excluded.                                                                                                                                                                                                                                                                                                                                                                                                                                                                                                                                                                                                                                                                                                                                                                                                                                                   |
| Replication     | All independent attempts to replicate the PRE-NMR data (sample size listed above) were successful. The MD ensembles were concatenated from 10 independent trajectories initiated from different initial coordinates and velocities.                                                                                                                                                                                                                                                                                                                                                                                                                                                                                                                                                                                                                                      |
| Randomization   | N/A, as typical for NMR and structural biology studies. Experiments and simulations were rationally designed to be systematic and answer specific technical and biological questions and therefore randomization was not applicable. All experiments and simulations were performed under well-controlled conditions.                                                                                                                                                                                                                                                                                                                                                                                                                                                                                                                                                    |
| Blinding        | N/A, as typical for NMR and structural biology studies. Our data analysis was systematic without any possible prior knowledge about the result and, thus, blinding was not applicable.                                                                                                                                                                                                                                                                                                                                                                                                                                                                                                                                                                                                                                                                                   |

## Reporting for specific materials, systems and methods

We require information from authors about some types of materials, experimental systems and methods used in many studies. Here, indicate whether each material, system or method listed is relevant to your study. If you are not sure if a list item applies to your research, read the appropriate section before selecting a response.

## Materials & experimental systems

## Methods

- | n/a                                 | Involved in the study                                  |
|-------------------------------------|--------------------------------------------------------|
| <input type="checkbox"/>            | <input checked="" type="checkbox"/> Antibodies         |
| <input checked="" type="checkbox"/> | <input type="checkbox"/> Eukaryotic cell lines         |
| <input checked="" type="checkbox"/> | <input type="checkbox"/> Palaeontology and archaeology |
| <input checked="" type="checkbox"/> | <input type="checkbox"/> Animals and other organisms   |
| <input checked="" type="checkbox"/> | <input type="checkbox"/> Clinical data                 |
| <input checked="" type="checkbox"/> | <input type="checkbox"/> Dual use research of concern  |
| <input checked="" type="checkbox"/> | <input type="checkbox"/> Plants                        |

- | n/a                                 | Involved in the study                           |
|-------------------------------------|-------------------------------------------------|
| <input checked="" type="checkbox"/> | <input type="checkbox"/> ChIP-seq               |
| <input checked="" type="checkbox"/> | <input type="checkbox"/> Flow cytometry         |
| <input checked="" type="checkbox"/> | <input type="checkbox"/> MRI-based neuroimaging |

## Antibodies

Antibodies used

Anti-histidine tag (1:5000 dilution, Invitrogen MA1-21315-HRP, lot WK337821), Pan-Ras Polyclonal Antibody (ThermoFisher, PA5-104464, rabbit IgG, 1:1000 dilution), anti-rabbit IgG HRP-linked (Cell Signalling Technology #7074, 1:1000 dilution)

Validation

Western blot visualisation as described on the manufacturers' websites:  
The anti-histidine antibody was verified by relative expression and cell treatment to confirm specificity to the antigen.  
The Pan-Ras antibody was verified by knockdown to ensure that the antibody binds to the target antigen.  
The anti-rabbit antibody was validated with Cell Signaling Technology primary antibodies.
